# Supplementary material for: Structural and magnetic phase diagram of CeFeAsO1− xFx and its relation to high-temperature superconductivity
Source: Springer Nature journal article supplement (doi:10.1038/nmat2315), 2008-10-26

## Supplementary Information

# Structural and magnetic phase diagram of $\text{CeFeAsO}_{1-x}\text{F}_x$ and its relationship to high-temperature superconductivity

Jun Zhao, Q. Huang, Clarina de la Cruz, Shiliang Li, J. W. Lynn, Y. Chen, M. A. Green, G. F.

Chen, G. Li, Z. Li, J. L. Luo, N. L. Wang, and Pengcheng Dai

Figure S1 below shows the BT-7 measurements on  $\text{CeFeAsO}$  at 1.5 K, 40 K, and 160 K. The  $(0,0,1)_M$  peak corresponds to a doubling of the  $c$ -axis unit cell for the Ce magnetic order, which disappears above the Ce Néel temperature of  $\sim 4$  K. Comparison of the 40 K and the 160 K scans reveals the positions of the Fe magnetic peaks as shown in Fig. 1c. Our detailed refinements for the determination of the Ce magnetic structure and its interaction with the iron spins will be published separately.

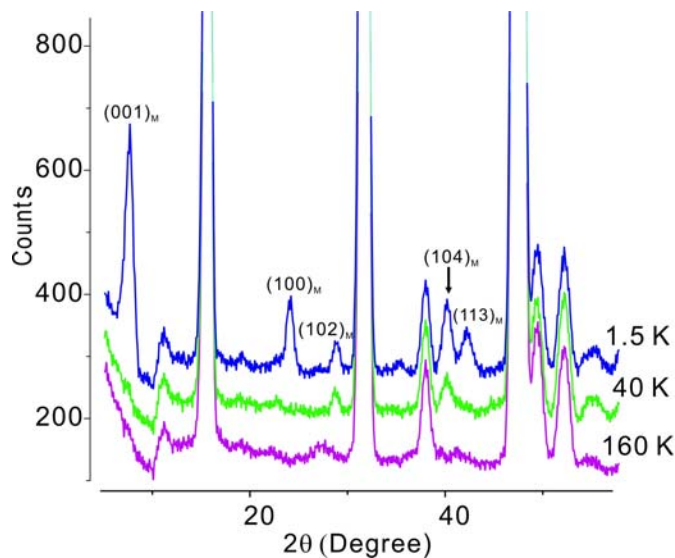

Supplement: 41563_2008_BFnmat2315_MOESM9_ESM.pdf [file 41563_2008_BFnmat2315_MOESM9_ESM.pdf]
